# Supplementary material for: Towards global empirical upscaling of FLUXNET eddy covariance observations: validation of a model tree ensemble approach using a biosphere model
Source: Copernicus journal article supplement (doi:10.5194/bg-6-2001-2009), 2009-10-06
Supplement: Supplementary file 1 [file bg-6-2001-2009-supplement.pdf]

## Pseudo-code of the model Tree Induction Algorithm (TRIAL)

```
FUNCTION: TRIAL

Initialise ModelTree structure

Flag root node as open node

WHILE GrowTree = true
  Find open leaf nodes

  FOR EACH open leaf node
    Find best split for open leaf node

    Flag node as closed node
  ENDFOR

  Calculate new tree BIC for each leaf node split

  Find best node to split: min(NewTreeBIC)

  IF NewTreeBIC < CurrentTreeBIC
    Split node

    Flag new children leaf nodes as open nodes
  ENDIF ELSE
    GrowTree = false
  ENDELSE
ENDWHILE

RETURN: ModelTree

END
```

## Pseudo-code of the function that determines the best split for continuous variables

```
FUNCTION FindBestContinuousVariableSplit
FOR EACH continuous split variable
  FOR EACH split location

    LeftMembers= WHERE(CurrentSplitVariable < CurrentValue)

    RightMembers= WHERE(CurrentSplitVariable >= CurrentValue)

    IF (nsamplesLeft >= MinSamples) AND (nsamplesRight >= MinSamples)
      Compute multiple regression for left and right child

      Compute the sum of left and right SSE
    ENDIF
  ENDFOR
ENDFOR

Find best variable and location: min(SSE)

Estimate coefficients for left and right children using stepwise variable
forward selection; selection criterion: significance and reduction of BIC

Estimate unbiased sum of squared errors for left and right child using
crossvalidation

RETURN: Best continuous split, coefficients, crossvalidated errors for left
and right child

END
```

## Pseudo-code of the function that determines the best split for categorical variables

FUNCTION: FindBestCategoricalSplit

FOR EACH categorical variable

    REPEAT UNTIL two categories are left

        Find best combination of two categories in sharing the same multiple regression:  $\min(\text{SSE})$

        Merge these two categories

    ENDREPEAT

ENDFOR

Select the variable where splitting results in largest error reduction:  
 $\min(\text{SSE})$

Estimate coefficients for left and right children using stepwise variable forward selection; selection criterion: significance and reduction of BIC

Estimate unbiased sum of squared errors for left and right child using crossvalidation

RETURN: Best categorical split, coefficients, and crossvalidated errors for left and right child

END

## Pseudo-code of the model tree ensemble method (Evolving tRees with RandOm gRowth ERROR)

PROCEDURE: ERROR

Grow deterministic tree with TRIAL

REPEAT UNTIL forest complete

    Choose an existing tree that will be modified:  $\text{Min}(\text{random} * \text{TreeBIC\_rank})$

    load tree from working directory

    Choose a random interior node with more than two leaf nodes that will be Pruned

    prune tree at this node

    grow tree randomly from this node

    grow tree deterministically from the new leaf nodes

    IF not all final split nodes are deterministic

        prune tree at final random split nodes

        make deterministic splits at final split nodes

    ENDIF

    save tree in working directory and store the BIC of the tree

ENDREPEAT

Select diverse trees for the ensemble

END
